# Supplementary material
Source: publisher figshare collection journal article supplement (https://sage.figshare.com/ndownloader/files/14909348)
Supplement: Supplementary file 1 [file 14909348]

**APPENDIX A: Interview Questions for Children in Isolation at Mattel Children's Hospital UCLA**

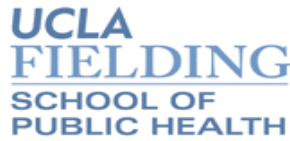

Mattel Children's Hospital

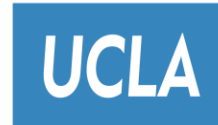

**Intake Form  
Interview Open-Ended Questions  
Mattel Children's Hospital UCLA**

**(STAFF ONLY)**

Study Subject ID#: \_\_\_\_\_

Interviewer Initials: \_\_\_\_\_

Date of Interview: \_\_\_\_\_

Child Age: \_\_\_\_\_

Reason for Isolation (Checkbox):

- ☐ Contact
- ☐ Droplet
- ☐ Spore
- ☐ Neutropenic

Length of Isolation: \_\_\_\_\_

One or more parent(s) with children during interview? Yes/No (circle)

If circled **Yes**, circle which parent(s) are with child: Mother/Father (circle)

If **NO**, is child unaccompanied by parents during his/her stay for the **entire duration** or for **part of it**? Circle Answer.

If answered for **part of it**, then indicate how many **times a week on average** a parent accompanies the child: \_\_\_\_\_

Non-Parent Caretaker with child during interview? Yes/No (circle)

---

**(For Child)**

*Hi (Child's name) - Today, I would like to learn more about you and what being in the hospital is like for you.*

**[Give children the choice of drawing or doing an arts and crafts activity (i.e. play-doh, legos) while they answer questions if possible]**

*Topic(s): Open-ended* (You can ask variations of each question depending on how child is responding. You can also try prefacing/rephrasing questions with “what sorts of situations make you feel this way?” or “can you tell me more about how you feel?”)

**Interview Questions**

1. What words or sentences do you like to hear when you have to stay in your room?
2. Which ones do you **NOT** want to hear?
3. Right now, can you go outside or to the playroom?
4. If not, do you know why not?
5. What is the hardest thing about being in your room when you can't go to the playroom? *(Does it make you mad or sad?)*
6. Is there anything that has made it easier for you when you can't go to the playroom and have to stay in your room?
7. Can you tell me what it is?

8. How come you had to come in to the hospital at first?
9. Has there ever been a time when you were not allowed to go outside or to the playroom?
10. Can you tell me what this is? **(Show child enclosed isolation sign from binder).**
